# Supplementary material
Source: publisher figshare collection journal article supplement (https://acs.figshare.com/ndownloader/files/20136707)
Supplement: Supplementary file 1 [file 20136707]

compound	SMILE	Growth inhibition MCF7:ws8 IC50 (nM)	Maximum efficacy in MCF7:ws8 (%)	Growth inhibition MCF7:5C IC50 (nM)	Maximum efficacy in MCF7:5C (%)	ERa ICW IC50 (nM)	RBA (%)	ERE luciferase IC50 (nM)	Spheroid Viability relative to vehicle in MCF7:ws8	Spheroid Viability relative to vehicle in MCF7:TAM1	ER degradation relative to vehicle	ER degradation + MG-231	Plasma concentration at 30 min (nM)	Plasma concentration at 2 hours (nM)	Brain concentration at 30 minutes	Brain concentration at 2 hours
30a	OC1=CC=C2C(SC(C(C3=C(C)C=CC=C3)=O)=C2OC4=CC=C(OCCN5CCC5)C=C4)=C1	0.50	70	0.31	35
30b	O=C(C1=C(C)C=CC=C1)C2=C(OC3=CC=C(OCCN4CC(C)C4)C=C3)C5=CC=C(O)C=C5S2	0.016	75	0.65	55	0.53		1.9
30c	OC1=CC=C2C(SC(C(C3=CC=CC=C3)=O)=C2OC4=CC=C(OCCN5CC(CF)C5)C=C4)=C1	0.55	65	15	60	1.3	30.7	4.3
30d	OC1=CC=C2C(SC(C(C3=CC=CC=C3C)=O)=C2OC4=CC=C(OCCN5CC(CF)C5)C=C4)=C1	0.73	70	0.65	40	0.73	46.5	1.5
30e	OC1=CC=C2C(SC(C(C3=CC=C(F)C=C3C)=O)=C2OC4=CC=C(OCCN5CC(CF)C5)C=C4)=C1	0.30	75	0.20	50	3.9		2.7
30f	OC1=CC=C2C(SC(C(C3=C(C)C=C(F)C=C3C)=O)=C2OC4=CC=C(OCCN5CC(CF)C5)C=C4)=C1	0.41	70	3.4	55	0.75	59.6	3.5	0.16	0.26			414	347	98.6	77.3
30g	OC1=CC=C2C(SC(C(C3=CC=C(O)C=C3)=O)=C2OC4=CC=C(OCCN5CC(CF)C5)C=C4)=C1	1.1	75	1.2	30	6.0	57	6.4
30h	OC1=CC=C2C(SC(C(C3=CC=C(O)C=C3C)=O)=C2OC4=CC=C(OCCN5CC(CF)C5)C=C4)=C1	0.50	80	7.9	45	4.9	21.9	14
30i	O=C(C1=CC=C(F)C=C1)C2=C(OC3=CC=C(OCCN4CC(CF)C4)C=C3)C5=CC=C(O)C=C5S2	1.3	70	0.58	55	1.3	9.15	2.8	0.11	0.40
30j	O=C(C1=CC=CC(F)=C1)C2=C(OC3=CC=C(OCCN4CC(CF)C4)C=C3)C5=CC=C(O)C=C5S2	0.28	75	1.4	60	0.34	120	1.3
30k	O=C(C1=CC=C(C)C=C1C)C2=C(OC3=CC=C(OCCN4CC(CF)C4)C=C3)C5=CC=C(O)C=C5S2	0.47	65	0.56	50	1.1		7.4
30l	OC1=CC=C2C(SC(C(C3=CC=CC=C3C)=O)=C2OC4=CC=C(OCCN5C[C@H](CF)CC5)C=C4)=C1	0.10	85	0.23	25	7.7		45
30m	O=C(C1=C(C)C=C(F)C=C1C)C2=C(OC3=CC=C(OCCN4C[C@H](CF)CC4)C=C3)C5=CC=C(O)C=C5S2	0.56	65	0.28	40	2.3	32.6	12					111	85.7	15.9	36.3
30n	OC1=CC=C2C(SC(C(C3=C(C)C=C(F)C=C3C)=O)=C2OC4=CC=C(OCCN5C[C@@H](CF)CC5)C=C4)=C1	0.36	70	0.16	50
30o	O=C(C1=C(C)C=CC=C1)C2=C(OC3=CC=C(OCCN4CCCCC4)C=C3)C5=CC=C(O)C=C5S2	0.39	65	>1000	0	>1000		23
37a	OC1=CC=C2C(SC(C(C3=CC=CC=C3)=O)=C2OC4=CC=C(OC5CN(CCCF)C5)C=C4)=C1	0.15	60	0.12	40	0.49		0.05
37b	OC1=CC=C2C(SC(C(C3=CC=CC=C3C)=O)=C2OC4=CC=C(OC5CN(CCCF)C5)C=C4)=C1	0.04	75	4.9	70	2.5	91.8	2.1	0.12	0.59
37c	OC1=CC=C2C(SC(C(C3=CC=C(F)C=C3C)=O)=C2OC4=CC=C(OC5CN(CCCF)C5)C=C4)=C1	0.15	70	0.95	50	8.3		5.2
37d	OC1=CC=C2C(SC(C(C3=C(C)C=C(F)C=C3C)=O)=C2OC4=CC=C(OC5CN(CCCF)C5)C=C4)=C1	0.55	75	0.15	70	1.1	27.8	3.1	0.15	0.26	0.54	1.1	2490	797	407	279
37e	OC1=CC=C2C(SC(C(C3=CC=CC(F)=C3)=O)=C2OC4=CC=C(OC5CN(CCCF)C5)C=C4)=C1	0.27	70	0.12	35
37f	OC1=CC=C2C(SC(C(C3=C(C)C=C(F)C=C3C)=O)=C2OC4=CC=C(OC5CN(C6CC6)C5)C=C4)=C1	0.42	65	1.0	20	12	38.1	11
